# Supplementary material
Source: PubMed Central journal article supplement (PMC3183873)
Supplement: hdy201082x3.pdf [file hdy201082x3.pdf]

Supplementary File S5.xml

```

<?xml version="1.0" standalone="yes"?>
<!-- Generated by BEAUTi v1.5.2
-->
<!--      by Alexei J. Drummond and Andrew Rambaut
-->
<!--      Department of Computer Science, University of Auckland
and
-->
<!--      Institute of Evolutionary Biology, University of
Edinburgh
-->
<!--      http://beast.bio.ed.ac.uk/
-->
<beast>

  <!-- The list of taxa analyse (can also include
dates/ages).
-->
  <!-- ntax=13
-->
  <taxa id="taxa">
    <taxon id="Medaka"/>
    <taxon id="Carp"/>
    <taxon id="Tetraodon"/>
    <taxon id="Salmon"/>
    <taxon id="Rainbow"/>
    <taxon id="Zebrafish"/>
    <taxon id="Stickleback"/>
    <taxon id="Fugu"/>
    <taxon id="Japanese"/>
    <taxon id="2n28"/>
    <taxon id="2n31"/>
    <taxon id="2n38XY"/>
    <taxon id="2n38"/>
  </taxa>

  <taxa id="28_31">
    <taxon idref="2n28"/>
    <taxon idref="2n31"/>
  </taxa>

  <taxa id="38_38XY">
    <taxon idref="2n38"/>
    <taxon idref="2n38XY"/>
  </taxa>

  <taxa id="Clupeocephala">
    <taxon idref="2n28"/>
    <taxon idref="2n31"/>
    <taxon idref="2n38"/>
    <taxon idref="2n38XY"/>
    <taxon idref="Carp"/>
    <taxon idref="Fugu"/>
    <taxon idref="Medaka"/>
    <taxon idref="Rainbow"/>
    <taxon idref="Salmon"/>
    <taxon idref="Stickleback"/>
    <taxon idref="Tetraodon"/>
    <taxon idref="Zebrafish"/>
  </taxa>

  <taxa id="Fugus">

```

Supplementary File S5.xml

```
<taxon idref="Fugu"/>
<taxon idref="Tetraodon"/>
</taxa>
<taxa id="Medaka_Fugus">
  <taxon idref="Fugu"/>
  <taxon idref="Medaka"/>
  <taxon idref="Stickleback"/>
  <taxon idref="Tetraodon"/>
</taxa>
<taxa id="Eigenmannias">
  <taxon idref="2n28"/>
  <taxon idref="2n31"/>
  <taxon idref="2n38"/>
  <taxon idref="2n38XY"/>
</taxa>

<!-- The sequence alignment (each sequence refers to a
taxon above). -->
<!-- ntax=13 nchar=227 -->
<alignment id="alignment1" dataType="nucleotide">
  <sequence>
    <taxon idref="Medaka"/>
TCTGTTAATTGCCTTGTCTTGTCTCTCGTTTTACGCGGTAAGTTCTACTTTAGTTAATTACTGTGG
AAG-GCTATCATTTAATAATGCCCTATAACAACCTCAAGTGGCCTCGAGAAGACACCACGCGCCCCG
GACAGCACGCAGAGAACTACCCGCGGCCAGATAGGCCTACTAGAGGTGCTCAACTGGACATATCT
TCACCGAGGGAACGTGTGCTTACTTCGAG
  </sequence>
  <sequence>
    <taxon idref="Carp"/>
TTTGTTAATCGCCATGTCATCTCTCTCGTTACCCCCGGTAAGTTCTAGGTTAGTCAATTTCTATGG
AAG-CCCgTTAATCAAAAACGTCCTATAACAACCTCAAGTGGCCTCGAGAAGACACCAAGCGCCCCG
GACACCACGCAAAGAAATCACCCGCGGCCAGACAGGCCTACCAGAGGTGCCCAACAGGACAGGGCT
CCATCGGGGGAACGTGTGCCCACTCCGAG
  </sequence>
  <sequence>
    <taxon idref="Tetraodon"/>
TCTGTTAATTGCCTTGTCTTCTCTTTTCGCTTCCCCCGGTAGGTTCTAGGTTAGTCAATTTCTATGG
AAG-CATGTCAGTCATAAACGCCCTATAACAACCTCAAGCGGCCTCAAGAAGTCAACAGGCGCCCCG
GACGCCACGCACAGAACTACCTGCGGCCAGACAGGCCTACCAGAGGTGCCCCACAGGACAAACCT
CCACCGGGGGAACGTGTGCTCACTCCGAG
  </sequence>
  <sequence>
    <taxon idref="salmon"/>
TCTGTTAATTGCCATGTCCTTCTCTCTCGTTTTCCCCCGGTAGGTTCTAGGTTAGTCAATTTCTATGG
AAG-GCCATCATTTAACAATGCCCTATAACAACCTCAAGCGGCTTCGAGAAGACACCAGGCGCCCCG
GACGCCACGCAAAGAACTACCCGCGGCCAGACAGGCCACCAGAGGTGCACAACAGGACATAGCT
CCACCGAGGGAACGTGTGCCCACTCCGAG
  </sequence>
  <sequence>
    <taxon idref="Rainbow"/>
```

Supplementary File S5.xml

TCTGTTAATTGCCATGTCTTCTCTCGTTTCCCCGGTAAGTTCTAGGTTAGTCAATTTCTATGG  
AAG-GCCATCACTCAACAACGCCCTATAACAACCTCAAGCGGCCTCGAGAAGACACCAGGCGCTTCG  
GACGCCACGCAAAGAACTACCCGCGGCCAGACAGGCCACCAGAGGTGCCCAACAGGACATAGCT  
CCACCGAGGGAACGTGTGTCCACTTCGAG

</sequence>

<sequence>

<taxon idref="zebrafish"/>

TTGTTAATCGCATTGTCTTTTCTTTTCGTTTCCCCGGTAAGTTCTACGTCGGTCAATTCCTATGG  
AAG-CTTGTCAGTTAAACTGCCCTATAACAACCTCAAGTGGCCTCGAGAAGAAACCAAGCGCCTCG  
GACTACTCGCAAAGAAATTACCTGTGGCCAGACAGGCCACCAGAGGTGCCCAACGGGATAGTGCT  
TCACCGGGGGAACGTGTACCTACTCCGAA

</sequence>

<sequence>

<taxon idref="stickleback"/>

TCTGTTAATTGCTTTGTCTCCTCTCTCGTTTCCCCGGCGAGTTGTAGGTTAGTCAATTTCTATGG  
AAG-GTTATTAATCAATAACGCCCTATAACAACCTAATGCGACCTCGAGAAGACACCACGTGCCCGG  
GACGCCACGCAAAGAACTACCTGCGGCCAGACAGGCCACTAGAGATGCCTCACGGGAAGAGGCT  
TCACCGGGGGAACGTGTGCCTACTTCGAG

</sequence>

<sequence>

<taxon idref="Fugu"/>

TCTGTTAATTGCCCTGTCTTCTCTTTTCGTTTCCCCAGGCAAGTTCTAGATTAGTCAATTTCTATGG  
AAGGCATGTTAGTCAAAAACGCCCTATAACAACCTGAAGCGGCCTCGAGAAGACAACAGGCGCCCCG  
GACAGCACACAAAGAGACTACCTGCGGCCAGACAGGCCTACCAGAGGTGCCCCACAGGACATACTT  
CCACCGGGGGAACGTGTGCCACTCCGAG

</sequence>

<sequence>

<taxon idref="Japanese"/>

TTTGTTAATTGCCTTGTCTTCTCTCTCGTTACCCCCGGTAAGTTCTAGGTTAGTCAATTTCTATGG  
AAG-AACATCACTTTAAACCGCCCTATAACAACCTCAAGTGGCCTCGAGAAGACACCAGGCGCCCCG  
GACGCCACGCAAAGAAATTACCCGCGGCCAGACAGGCCTACCAGAGGTGCTCAACAGGACAGAGCT  
CTACCGGGGGAACGTGTGCCACTCCGAG

</sequence>

<sequence>

<taxon idref="2n28"/>

TCTATTAATTGCCATGTCTTCTCTGTCGTTACCCCAGGTAAGTTCTACGTTAGTCAATTTCTACGG  
AAG-CATATCAGTTTAAACTGCCCTATAACAACCTCAAGCGGCCTCGAGAAGACACCAGGCGCTTCG  
GACGTCACGCAAAGAAATTACCCGCGGCCAGATAGGCCACCAGAGGTGACCAAACGGCAGAGCC  
CCACCGGGGGAACGTGTGCCTACTCCGAG

</sequence>

<sequence>

<taxon idref="2n31"/>

TCTATTAATTGCCATGTCTTCTCTGTCGTTACCCCAGGTAAGTTCTACGTTAGTCAATTTCTACGG  
AAG-CATATCAGTTTAAACTGCCCTATAACAACCTCAAGCGGCCTCGAGAAGACACCAGGCGCTTCG  
GACGTCACACAAAGAAATTACCCGCGGCTAGATAGGCCACCAGAGGTGACCAAACGGCAGAGCC  
CCACCGGGGGAACGTGTGCCTACTCCGAG

</sequence>

<sequence>

<taxon idref="2n38XY"/>

Supplementary File S5.xml

```
TCTATTAATTGCCATGTCTTCTCTGTCGTTACCCCAGGTAAGTTCTACGTTAGTCAATTTCTACGG
AAG-CACATCAGTCCAAACTGCCCTATAACAACCTCAAGCGGCTTTGAGAAGACACCAGGCGCCTCG
GACGTCACGCAAAGAAACTACCCGTGGCCAGACAGGCCACCAGAGGTGACCAAACGCCAGAGCT
CCACCGGGGGAACGTGTGCCCACTTCGAG
```

```
</sequence>
```

```
<sequence>
```

```
<taxon idref="2n38"/>
```

```
TCTATTAATTGCCATGTCTTCTCTGTCGTTACCCCAGGTAAGTTCTACGTTAGTCAATTTCTACGG
AAG-CACATCAGTCCAAACTGCCCTATAACAACCTCAAGCGGCTTTGAGAAGACACCAGGCGCCTCG
GACGTCACGCAAAGAAACTACCCGTGGCCAGACAGGCCACCAGAGGTGACCAAACGCCAGAGCT
CCACCGGGGGAACGTGTGCCCACTTCGAG
```

```
</sequence>
```

```
</alignment>
```

```
<!-- The sequence alignment (each sequence refers to a
taxon above). -->
```

```
<!-- ntax=13 nchar=226
```

```
-->
```

```
<alignment id="alignment2" dataType="nucleotide">
```

```
<sequence>
```

```
<taxon idref="Medaka"/>
```

```
GTA CTTTATGCAAAAAGCTTATGAAAATCCTAGTAGAATTCAGCTATGTACACTAACCACGCCGT
CAGCCTTTCTTTTTTCTATTGTTCACTCCCCATCTATCTCTCTGTCCTTTGTGAACCACTGATTCA
GCCCTTCTTTTTACTGTTTGCTCTGTGTCCATCCGATTTATCCCTTTTTCTTCTCTTCTTTT
TTCTTATCTCTTACATTTTTTTGTATAAA
```

```
</sequence>
```

```
<sequence>
```

```
<taxon idref="Carp"/>
```

```
GAACTCCATACAATAATTTCTCACAACAATCACAATAATTCGCCGCAAATCCATTCAAAAAATAAA
TAACTTTCTTTTTTCTATTGTTCACTCCCCATCTATGTCTCTGTCCTTTGTGAACCTCTGATTCA
GCCTCTTCTTTTTACTGTTTGCTCTGTGTCCATCCGATTTATCCCTTTTTCTTCTCTTCCCTTT
TTCTTATCTCTTACATTTTTTTGTATAAA
```

```
</sequence>
```

```
<sequence>
```

```
<taxon idref="Tetraodon"/>
```

```
GAACTTTATATAGCCCCGTCCCCTCAAACCACATCAACCCCAACAACACCTACCAACCCCAACAAG
CAACTTTCTTTTTTCTATTGTTCACTCCCCATCTATGTCTCTGTTCTTTGTGAACCCCTGATTCA
GCCTCTTCTTTTTACTGTTTGCTCTGTGTCCATCCGATTTATCCCTTTTTCTTCTCTTCCCTTT
TTCTTATCTCTTACATTTTTTTGTATAAA
```

```
</sequence>
```

```
<sequence>
```

```
<taxon idref="salmon"/>
```

```
GAACTCATGCCGTATTATTTAACTAACTCACACCAACCCTCTCAAATCCATTAATTACCTAAC
TAACTTTCTTTTTTCTATTGTTCACTCCCCATCTATGTCTCTGTCCTTTGTGAACCCCTGATTCA
GCCTCTTCTTTTTACTGTTTGCTCTGTGTCCATCCGATTTATCCCTTTTTCTTCTCTTCCCTTT
TTCTTATCTCTTACATTTTTTTGTATAAA
```

```
</sequence>
```

```
<sequence>
```

```
<taxon idref="Rainbow"/>
```

Supplementary File S5.xml

GAACCCCATGCCACATCATCCAAACCAATTCTCCTCAAACCCATCGAGGCCCATCGATTAGATACT  
CGACCTTCCTTTTTCTATTGTTCACTCCCCATCTATGTCTCTGTCCTTTGTGAACCCCTGATTCA  
GCCTCTTCCTTTTTACTGTTTGCTCTGTGTCCATCCGATTTATCCCTTTTTCTTCCTCTTCCTTT  
TTCTTATCTCTTACATTTTTTTGTATAAA

</sequence>

<sequence>

<taxon idref="zebrafish"/>

GAACCCTACGCCCTATCCTCCTCATATATTTTTAAAAACCTATCCCAAAGTAACACATGCAACTCC  
CAACTTTCTTTTTCTATTGTTCACTCCCCATCTATGTCTCTGTCCTTTGTAAACCTCTGATTCA  
GCCTCTTCCTTTTTACTGTTTGCTCTGTGTCCATCCGATTTATCCCTTTTTCTTCCTCTTCCTTT  
TTCTTATCTCTTACATTTTTTTGTATAAA

</sequence>

<sequence>

<taxon idref="stickleback"/>

GCACTTTGTACCTTAATCAACTTCCCCACTTCTCTCAAACCATGTCGTATTTTTAAGTCTAACTAA  
TAACCTTCCTTTTTCTATTGTTCACTCCCCATCTATGTCCCTGTCCTTTGTGAACCACTGATTCA  
GCCGCTTCCTTTTTACTGTTTGCTCTGTGTCCATCCGATTTATCCCGTTTTCTTCCTCTCTCTTT  
TTCTTATCTCTTACATTTTTTTCTATAAA

</sequence>

<sequence>

<taxon idref="Fugu"/>

GAACCCCATCCCTTTTCGTCCTCGATGCCCAACCTACCTTTAATACATTTATTAAGCCAACAAG  
CAACTTTCTTTTTCTATTGTTCACTCCCCATCTATCTCTCTGTCCTTTGTGAACCCCTGATTCA  
GCCACTTCCTTTTTACTGTTTGCTCTGTGTCCATCCGATTTATCCCTTTTTCTTCCTCTTCCTTT  
TTCTTATCTATTACATTTTTTTGTATAAA

</sequence>

<sequence>

<taxon idref="Japanese"/>

GAATTCACACCACAATTACTCGAATTCCCTACAAACCACACAATGCTCATAAACTCAATTGA  
TAACTTTCTTTTTCCATTGTTCACTCCCCATCTATGTCTCTGTCCTTTGTGAACCTCTGATTCA  
GCCTCTTCCTTTTTACTGTTTGCTCTGTGTCCATCCGATTTATCCCTTTTTCTTCCTCTTCCTTT  
TTCTTATCTCTTACATTTTTTTGTATAAA

</sequence>

<sequence>

<taxon idref="2n28"/>

GAACCCTACACCACAATCTCACCACCCACGCCATCAAACCAACCGACACACCCAAATCACTCCAC  
CAACTTTCTTTTTGTATTGTTCACTCCCCATCTATGTCTCTGTCCTTTGTGAACCCCTGATTCA  
GCCTTTTCCTTTTTACTGTTTGCTCTGTGTCCATCCGATTTATCCCTTTTTCTTCCTCTTCCTTT  
TTCTTATCTCTTACATTTTTTTGTATAAA

</sequence>

<sequence>

<taxon idref="2n31"/>

GAACCCTATACCATAATTTACCACCCACGCCATCAAACCAACCGACACGCCAAATCCCTCCAC  
CAACTTTCTTTTTGTATTGTTCACTCCCCATCTATGTCTCTGTCCTTTGTGAACCCCTGATTCA  
GCCTTTTCCTTTTTACTGTTTGCTCTGTGTCCATCCGATTTATCCCTTTTTCTTCCTCTTCCTTT  
TTCTTATCTCTTACATTTTTTTGTATAAA

</sequence>

<sequence>

<taxon idref="2n38XY"/>

Supplementary File S5.xml

```
GAACCTCATACCACAATCTCATCCCCTAAACCTACCGAATCAATCGACATACCCAGATCCCTCCAT  
CAACTTTCTTTTTTGTATTGTTCACTCCCCATCTATGTCTCTGTCTTTGTGAACCCCTGATTCA  
GCCTTTTCTTTTTACTGTTTGTCTGTGTCCATCCGATTTATCCCTTTTCTCCTCTTCCCTTT  
TTCTTATCTCTTACATTTTTTTGTATAAA
```

```
</sequence>
```

```
<sequence>
```

```
<taxon idref="2n38"/>
```

```
GAACCTCATACCACAATCTCATCCCCTAAACCTACCGAATCAATCGACATGCCAGATCCCTCCAT  
CAACTTTCTTTCTTTGTATTGTTCACTCCCCATCTATGTCTCTGTCTTTGTGAACCCCTGATTCA  
GCCTTTTCTTTTTACTGTTTGTCTGTGTCCATCCGATTTATCCCTTTTCTCCTCTTCCCTTT  
TTCTTATCTCTTACATTTTTTTGTATAAA
```

```
</sequence>
```

```
</alignment>
```

```
<!-- The sequence alignment (each sequence refers to a  
taxon above). -->
```

```
<!-- ntax=13 nchar=227
```

```
-->
```

```
<alignment id="alignment3" dataType="nucleotide">
```

```
<sequence>
```

```
<taxon idref="Medaka"/>
```

```
AATACTGCTAACACCGGCCAGCGCGCCTGCTTCCGGCTAAACCGACCGGTAATTGACATCCAACGG  
CATGCCTAACTAGTATCACAAGCGATGTATACATAACATTACGTAAACATTTAATACACGTACCCT  
AGCACTTCCCACGCAATCTTTCCTTAGCATTACATTATTATGGTAAATTTTTGAATATCTAACTAA  
TACCCGATCTAATACCATATAATTTAAAC
```

```
</sequence>
```

```
<sequence>
```

```
<taxon idref="Carp"/>
```

```
AAGATTGCTGACTTCGACAAGGGAGCCTGCTCACCGCTAAACCAAACGTTAACTAACCACCCAGGG  
CATGAAAACAAATCATATTGTCAAGTCCACAAAACACTGATCGTAACTTATTGAATAAATCAACAAA  
AAACTAGCCAATCCAATCATCCAACGACAACTACATCGACACCCATATTCAAAAAAACACTCAC  
CCAAAATACAACATTATATTACATAAAC
```

```
</sequence>
```

```
<sequence>
```

```
<taxon idref="Tetraodon"/>
```

```
AACATTGCTTACACTGACCAGCGCCCCTACTCGTTCTGAACCTACCATTAECTACCCCCCAAGG  
CATGCTATCCAACCATCTCAACCTATCTCCACACCACAGGTCCTAAAATCTAAAACCTCCAACCTA  
ACCCACACACTTTCACCCCTCAGCAACAATCCCAACCGATAACCATTCCACCAAAACCTCAACCG  
CTACTAAGCCAACACTCCCCAATTCAAAC
```

```
</sequence>
```

```
<sequence>
```

```
<taxon idref="salmon"/>
```

```
AACATTGCTAACATCGACCAGGGCACCTACTCACTACTCAACCAACCGTTAACTACCCCCCATGG  
CATGATAATCAAATACCATAACTACCACCCAATCATACTACCAACAAATTCGACACCCCACTCGG  
AATCCAACGTTTTCAATCTTCCCCCTTAACTCAACCCATAACTAACTCCATTATAAACATTCCC  
CATCTTATCTCACACCATTACACCCAAC
```

```
</sequence>
```

```
<sequence>
```

```
<taxon idref="Rainbow"/>
```

Supplementary File S5.xml

AACATTGCTAACATCGACCAGGGTACCTACTCACTGCTCAACCAACCGTTAACTACCCCTCCACGG  
CATGATAATCCAATTTATATCATATACCGCAGCCATGCCACAGGTTAATCCAACGTGCCCTAGT  
AACCTAGCAAGCTCAATCTTCCCCTCAATACTCAACCTTCAATTAACCTTTATAATAAACATTTCC  
TACCTCACCACGTACCTTCACACCTAAAC

</sequence>

<sequence>

<taxon idref="zebrafish"/>

AAAATTGCTGACTCTGACCACGGACCCTCCTCGCATCTAAACCAAGCATTAGCTAACCAACCATAG  
CATGATATCTAAACACATTTAATTTTTTAAACACTGTAATAACAATCAATCAAATAGTTCAATTAA  
AACCCAATGCTTTCAATCATTAAATAGAATTACCAACCAATATTCAAATTAATAAAAAAATATCCCT  
CATCGAATAAAACACCCTTTTACATGAAC

</sequence>

<sequence>

<taxon idref="stickleback"/>

AATATTGCTAACGTAGACTGGAGAGCCTGCCACAGCTAAACTCGCCGTTAACTACCCCCGACGG  
CATGATAACCAATTACAATATCTTCTTCCACACATTACTATCTAAATATTAATAACCCATCTCA  
AACTCTATAAACCAATCGTTCCACGCCAGGTTTAAACATTAATCAACCATATTGCTATTTTCAA  
TACCTTACCATATACCGTTTAACTCAAAC

</sequence>

<sequence>

<taxon idref="Fugu"/>

AACATTGCTCACAGTGACCAGCGCCTCTACTCACAATAAACCTACCACTAACTACCCCCCAAGG  
CATGCTA-CAAAGCATCCTGAACTACACCCAGTCATACATAACAACCAACCAACCAACACCTTA  
ACCCCTACTCATTATCCCCTATAAAATAACTCCAACCGGTAACTATTACCCTAATCCTGAACAA  
CCGATAACCAACACTTCATTACCTAAAC

</sequence>

<sequence>

<taxon idref="Japanese"/>

AACATTGCTAACATAGATTAATGCACCTACTCACATCTCAACGCACCGTTGACTACCCCCCAGGG  
CATGACAAATAAATAAAACAAAACACACAAACAATATGATACAAATCCACTTAATAATAGAATAGA  
AAAATAACGATTCCAATCATTAAACATAGTAACGAACCTATATCTTACTGTAATAAATTAAGA  
CTAAAGAAATTACATCATATAACGTTAAC

</sequence>

<sequence>

<taxon idref="2n28"/>

TGCATTGCTAACACCGACCAGAGCACCTATTCTCTGCTTAACCAACCGTCAACTACCCCCCAGGG  
CATGCCTCCAAACCAGCTCAACCCACCCCAAATCCCACACAATGAAAGCTAACCAACAATCCAAA  
ACTATACCCCCCAACCATTGTCCACTAACTAACTCCCAATACCCTTGCAAAACGCAATCTCA  
ATTCTTACATCGTGCCATTTAACCTTAAC

</sequence>

<sequence>

<taxon idref="2n31"/>

TGCATTGCTAACACCGACCAGAGCACCTATTCTCTGCTCAACCAACCGTCAACTACCCCCCAGGG  
CATGCCTCCAAACCAGCTCAACCCACCCCAAATCCTACACAATAAAAATTAACCAACATTCCAAA  
ACTATACCCCCCAACCATTATCCACTAAACCAACCCTCCAATACCCTACAAAACGCAATCTTA  
ATTCTTACATCGTGCCATTTAACCTTAAC

</sequence>

<sequence>

<taxon idref="2n38XY"/>

Supplementary File S5.xml

```
AGCATTGCTAACACCGACCAGAGCACCTGCTCTCTGCTTAACCAACCGTTAACTACCCCCCACGG  
CATGCCTGCAAATTAACCCAAGCTACATCAAACCCCCACACGACAGGAATTCGACGACACTCCAGA  
AACTTATCTTTTCCAATCATTACTCATCAAACCAACCCTTTAACACTTTTGCAAAGACGATCCCA  
CCCCGTATATCGTACCATATAACCTAAAC
```

```
</sequence>
```

```
<sequence>
```

```
<taxon idref="2n38"/>
```

```
AGCATTGCTAACACCGACCAGAGAACCTGCTCTCTGCTTAACCAACCGTTAACTACCCCCCACGG  
CATGCCTGCAAATTAACCCAAGCTACATCAAACCCCCACACGACAGGAATTCGACGACACTCCAGA  
AACTTATCTTTTCCAATCATTACTCATCAAACCAACCCTTTAACACTTTTGCAAAGACGATCCCA  
CCCCGTATATCGTACCATATAACCTAAAC
```

```
</sequence>
```

```
</alignment>
```

```
<!-- The sequence alignment (each sequence refers to a  
taxon above). -->
```

```
<!-- ntax=13 nchar=110
```

```
-->
```

```
<alignment id="alignment4" dataType="nucleotide">
```

```
<sequence>
```

```
<taxon idref="Medaka"/>
```

```
TGGATGCTTGTGTCCATTCGTTTCTAACCATCCCTCCTCATGGATAAGGTTGATACAGCCTTTTGT  
ATATCGGTAAGCATAAACGATGTTTTTTTTTTCCTTGATTCCGAT
```

```
</sequence>
```

```
<sequence>
```

```
<taxon idref="Carp"/>
```

```
CGGATGCTTGTGTTTCAATTCGTTTCTAACCATCCCTCCTCATGGATAAGGTTGATACAGCCTTTTGT  
ATATCGGTAAGCATAAACGATGTTTTTTTTTTCCTTGATTCCGAT
```

```
</sequence>
```

```
<sequence>
```

```
<taxon idref="Tetraodon"/>
```

```
CGGATGCTTGTGTTTCAATTCGTTTCTAACCATCCCTCCTCATGGATAAGGTTGATACAGCCTTTTGT  
ATATCGGTAAGCATAAACGATGTTTTTTTTTTCCTTGATTCCGAT
```

```
</sequence>
```

```
<sequence>
```

```
<taxon idref="salmon"/>
```

```
TGGATGCTTGTGTCCATTCGTTTCTAACCATCCCTCCTGATGGATGAGGTTGATACAGCCTTTTGT  
ATATCGGTAAGCATAAACGATGTTTTTTTCTTCCTTGATTCCGAT
```

```
</sequence>
```

```
<sequence>
```

```
<taxon idref="Rainbow"/>
```

```
TGGATGCTTGTGTCCATTCGTTTCTAACCATCCCTCCTGATGGATGAGGTTGATACAGCCTTTTGT  
ATATCGGTAAGCATAAACGATGTTTTTTTCTTCCTTGATTCCGAT
```

```
</sequence>
```

```
<sequence>
```

```
<taxon idref="Zebrafish"/>
```

```
CGGATGCTTGTGTTTCAATTCGTTTCTAACCATCCCTCCTTATGGATATGGTTGGTACAGCCTTTTGT  
ATATCGGTAAGCATAAACGATGTTTTTTTTTTCCTTGATTCCGAT
```



Supplementary File S5.xml

```
</sequence>  
<sequence>  
  <taxon idref="Stickleback"/>
```

```
TGGATGCTTGTGTTTATTCGTTTCTAACCATCCCTCCTGATGGATAAGGTTGATACAGCCTTTTGT  
ATATGGGTAAGCATAAACGATGTTTTTTTTTTCCTTGATTCCGGAT
```

```
</sequence>  
<sequence>  
  <taxon idref="Fugu"/>
```

```
CGGATGCTTGTGTTTCATTCGTTTCTAACCATCCCTCCTCATGGATAAGGTTGATACAGCCTTTTGT  
ACATGGGTAAGCATGAACGATGTTTTTTTTTCCCTTGATTCCGGAT
```

```
</sequence>  
<sequence>  
  <taxon idref="Japanese"/>
```

```
CGGATGCTTGTGTTTCATTCGTTTCTAACCATCCCTCCTCATGGATAAGGTTGATACAGCCTTTTGT  
ATATCGGTAAGCATAAACGATGTTTTTTTTTTCCTTGATTCCGGAT
```

```
</sequence>  
<sequence>  
  <taxon idref="2n28"/>
```

```
CGGATGCTTTTGTTCATTCGTTTCTAACCATCCCTCCTCATGGATAAGGTTGATACAGCCTTTTGT  
ATATGGGTAAGCTTAAACGATGTTTTTTTTTTCCTTGATTCCGGAT
```

```
</sequence>  
<sequence>  
  <taxon idref="2n31"/>
```

```
CGGATGCTTTTGTTCATTCGTTTCTAACCATCCCTCCTCATGGATAAGGTTGATACAGCCTTTTGT  
ATATGGGTAAGCTTAAACGATGTTTTTTTTTTCCTTGATTCCGGAT
```

```
</sequence>  
<sequence>  
  <taxon idref="2n38XY"/>
```

```
CGGATGCTTTTGTTCATTCGTTTCTAACCATCCCTCCTCATGGATAAGGTTGATACAGCCTTTTGT  
ATATGGGTAAGCTTAAACGATGTTTTTTTTTTCCTTGATTCCGGAT
```

```
</sequence>  
<sequence>  
  <taxon idref="2n38"/>
```

```
CGGATGCTTTTGTTCATTCGTTTCTAACCATCCCTCCTCATGGATAAGGTTGATACAGCCTTTTGT  
ATATGGGTAAGCTTAAACGATGTTTTTTTTTTCCTTGATTCCGGAT
```

```
</sequence>  
</alignment>
```

```
<!-- The sequence alignment (each sequence refers to a  
taxon above). -->
```

```
<!-- ntax=13 nchar=111  
-->
```

```
<alignment id="alignment5" dataType="nucleotide">  
  <sequence>  
    <taxon idref="Medaka"/>
```

```
ATAACTTTTTCATTACCACCGCTTTCATTACCCCAACGATACCCGTTCCCAACGTATACCTTTCCCC  
TCTCTAACGCCACCGCGAAATCTATTTAAAAAATCATCTACAGAA
```

Supplementary File S5.xml

```
</sequence>  
<sequence>  
  <taxon idref="Carp"/>
```

AAAACCTACCAAACATCATACCACACACCCACTACACATTCCCCACATCCAACCTTACCCAAACCCTC  
CCACCCACACCAACTCAACACTTACTAAACGAACCTCTTTAAAAA

```
</sequence>  
<sequence>  
  <taxon idref="Tetraodon"/>
```

TCAACTCCTAGCCACCACAAAACAAACCCACCTTCTACTCCCCACCCCAACGCCACATCCTCCT  
ACACCAAACCCCGAAACATCAATTAACACCCACCCCAAGG

```
</sequence>  
<sequence>  
  <taxon idref="Salmon"/>
```

ATAACTCACACATACCACTCGCCACACCCCTCAATTCTTCTCATTCTCACCTCTCTCAATCCTCT  
TTACCCAATTTTCTATAACATCATATATCTAATCCACCTTAAAAA

```
</sequence>  
<sequence>  
  <taxon idref="Rainbow"/>
```

ACAACTCAAACATATCATTGCGCCACGCTCCCTAATCCTTCCCCATTTCCACTACCTCCAATCTTCT  
TTATCCAATCCCGCCCAACGTCATATATCTAATCTACCCCGAAAA

```
</sequence>  
<sequence>  
  <taxon idref="Zebrafish"/>
```

AGAATTATCTAATTTAATAAAATAAACCCACCAAATATTGTTTCATATCCATTGCCTCTGTCCCCC  
GTTCCCAAATCATTTTTATACCAACGCATAAAATTGCCCTAGCAA

```
</sequence>  
<sequence>  
  <taxon idref="Stickleback"/>
```

AAAACCTTCTATCATCATCTGTCTAGCCTCTTTATTCCCATCCATATCTAATACCCCCCACTCCCT  
CTATTCAATCTCTCACAGACCAATTATATGAACCTTTCTAAAAG

```
</sequence>  
<sequence>  
  <taxon idref="Fugu"/>
```

CCAACCTTACAACCTTAACCAAGCTAACCACCCTCCTACACCTCACACCCAATCTACACTCACTTTC  
ACCCCAATTCTCTCATAACACAGACCATAAGCCTCACCTTAAAAA

```
</sequence>  
<sequence>  
  <taxon idref="Japanese"/>
```

AAAATTCTCAAACCTTGACTAAACAAACCAACTATCTCAACCCCACTTTAACCATATACGCCCTCC  
CCTCAATCCCACTCAAACCAACAAATAACAATAAAAAA

```
</sequence>  
<sequence>  
  <taxon idref="2n28"/>
```

AAAACCTCCCAAACCTAAATTACACAAACTCACTATCCCTTTCTCACACCGGTCCCATCCATACCTTT  
CCGCTATCTCCCCCGAACATCACCATCATAACATTACGCAAAAA

```
</sequence>  
<sequence>
```

Supplementary File S5.xml  
<taxon idref="2n31"/>

AAAACCTCCAAACTAAATTACACAGACCCACTATCCCTTTCTCGCACCAGTCCCATCCACACCTTT  
TCACTAGCTCCCCCGCAACATTATCATCATAACATAATGCAAAAA

</sequence>

<sequence>

<taxon idref="2n38XY"/>

AAAACCTTAAATAAAATTAGACAAACCCACCATCCCCTCCTCACATCAATCACGCCCCGCACCCTT  
TTACTAACCTCACATAACATTACACCACAGCATAATCCAAAA

</sequence>

<sequence>

<taxon idref="2n38"/>

AAAACCTTAAATAAAATTAGACAAACCCACCATCCCCTCCTCACATCAATCACGCCCCGCACCCTT  
TTACTAACCTCACATAACATTACACCACAGCATAACCAAAAA

</sequence>

</alignment>

<!-- The sequence alignment (each sequence refers to a  
taxon above). -->

<!-- ntax=13 nchar=111

-->

<alignment id="alignment6" dataType="nucleotide">

<sequence>

<taxon idref="Medaka"/>

GTTATGTCCGCTTGGCAAAGCTCGACTATGAGAGTTTGGCATCGGATGTCACAACGAGGTTTTATA  
TCCAGCGTTTGTGTTTAGATAGGGACCCCGAAAGTGGTGTCTGCAT

</sequence>

<sequence>

<taxon idref="Carp"/>

GTTATGTCCGCTTAACATAGCTCGACTATGATAGTTTGCATCGGATGTCACAGCGAGGTTTTATA  
TACAGCGCTTGTCTAGATAAGGGCCCCGAAAGTGGTGCCTGCAT

</sequence>

<sequence>

<taxon idref="Tetraodon"/>

GTTATGTCCGCTTGGCACAGCTCGACTATGAGAGTTTGGCATCGGATGTCACACCGAGGTTTTATT  
TTCAGCGCTTGTTCAGATAAGGGCCCCGAGAGTGGTGCCTGCAT

</sequence>

<sequence>

<taxon idref="salmon"/>

GTTATGTCTGCTCGACACAGCTCGACTATGATAGTTTGTGCATCGGATGTCACAACGAGGTTTTATA  
TACAGCGCTTGTCTAGATAAGGGCCCCAAAAGTGGTGCCTGCAT

</sequence>

<sequence>

<taxon idref="Rainbow"/>

GTTATGTCCGCTTGGCACAGCTCGACTATGATAGTTTGTGCATCGGATGTCACAACGAGGTTTTATA  
TACAGCGCTTGTTCAGATAAGGGCTCCAAAAGTGGTGCCTGCAT

</sequence>

<sequence>

Supplementary File S5.xml  
<taxon idref="Zebrafish"/>

GTTATGTCCGTTCAACATAGCTTGACTATGATAGTTTGGCATCGGATGTCACAACGAGGTTTTATC  
TACAGCGCTTGTTCTAGATAAGGGCTTCGAAAGTGGTGCCTGCAT

</sequence>

<sequence>

<taxon idref="Stickleback"/>

GTTATGTCCGCTTAACACAGCTCGACTATGAGAGTTTGGCATCGGATGTCACACCGAGGTTTTATA  
TACAGCGCTTGTTTTAGATAAGGGCCCTGAAAGTGGTGCCTGCAT

</sequence>

<sequence>

<taxon idref="Fugu"/>

GTTATGTCCGTTCAACAAAGCTCGACTATGATAGTTTGGCATCGGATGTCACACCGAGGTTTTATT  
TTCAGCGCTTGTTCAAGATAGGGGCTCTGAGAGTGGTGCCTGCAT

</sequence>

<sequence>

<taxon idref="Japanese"/>

GTTATGTCCGCTCATCACAGTTCGACTATGATAGTTTGGCATCGGATGTTACATCGAGGTTTTATC  
TCCAGCGCTTGTTCTAGATAAGGGCTCTGAAAGTGGTGCCTGCAT

</sequence>

<sequence>

<taxon idref="2n28"/>

GTTATGTCCCCTCAGCAAAGCTCGACTATGATAGTTTGGCATCGGATGTTACACCGAGGTTTTATA  
TCCAGCGCTTGTTCTAGATAAGGGCTTCGAAAGTGGTGCCTGCAT

</sequence>

<sequence>

<taxon idref="2n31"/>

GTTATGTCCCCTCAGCAAAGCTCGACTATGATAGTTTGGCATCGGATGTTACACCGAGGTTTTATA  
TCCAGCGCTTGTTCTAGATAAGGGCTTTGAAAGTGGTGCCTGCAT

</sequence>

<sequence>

<taxon idref="2n38XY"/>

GTTATGTCCCCTCAGCAGAGCTCGACTATGATAGTTTGGCATCGGATGTTACACCGAGGTTTTATA  
TCCAGCGCTTGTTTTAGATAAGGGCTTTGAAAGTGGTGCCTGCAT

</sequence>

<sequence>

<taxon idref="2n38"/>

GTTATGTCCCCTCAGCAGAGCTCGACTATGATAGTTTGGCATCGGATGTTACACCGAGGTTTTATA  
TCCAGCGCTTGTTTTAGATAAGGGCTTTGAAAGTGGTGCCTGCAT

</sequence>

</alignment>

<!-- The sequence alignment (each sequence refers to a  
taxon above). -->

<!-- ntax=13 nchar=173

-->

<alignment id="alignment7" dataType="nucleotide">

<sequence>

Supplementary File S5.xml  
<taxon idref="Medaka"/>

AACTGCTATCAGCGCGAAGATGATCTCCGTAGCGAAACGACCCAGCCCCCGGGGAAATTTACTGG  
GGAAGTATAAGTCTGCTGACCAACCCAGAAAAGCTCACGTGCCCGTCCGGGCGTGAAGCGTTA  
TCACGCTGCCCCATCGA-CCCAATTGCATACGGGTGGTACA

</sequence>

<sequence>

<taxon idref="Carp"/>

AACTCCGACTTAGGCGAACATGATCTCCGTAGCGAAACGAACCAGCCCCCGGGGAAATTCACGAG  
GGAAGTAAAAGTAAGGTAAGCTACAGAAATAGGTGCAAGCGCACTTACGGCCGTGCCAGCACTA  
TCACGCTGCAACAGCAAGCCCCACTGATTATGGGTGGTACA

</sequence>

<sequence>

<taxon idref="Tetraodon"/>

AACTAAGTTCTGCCCCGAAAAGAATCTCAGTAGCGAAACGAACCAGCCCCCGGGGAAATTCACGAG  
GGACCTGAAAAGTCAGCTGCCCAACCCCTATAACGCGCAAGCGCCCATCCGGCCGTGCAAGCGCTA  
TCACGCTGCCCCCCAA-CACCGACGGCTACAGGTGGCACA

</sequence>

<sequence>

<taxon idref="Salmon"/>

AACTGCAATCTATGCGAACATGATCTCCGTAGCGAAACGAACAAGCCTCCCGAGGAAATTTACGAG  
GGAAGTAAAAGTCGGGTGACCCTCCCGAAAGACGCGCACGCGCCTTTTCGGCCGCGCAAGCACTA  
TCACGCTGCAACGGCAAATTCAGAGCCTACGGGTGGCACA

</sequence>

<sequence>

<taxon idref="Rainbow"/>

AACTGCAATCTACGCGAGCATGATCTCCGTAGCGAAACGAACAAGCCCCCGAGGAAATTTACGAG  
GGAAGTAAAAGTCGGGTGACCCTCCCGAAAGATGCGCACGCGCCTTCCGGCCGCGCAAGTACTA  
TCACGCTGCAACGGCAAATTCGAAGCCTACGGGTGGCACA

</sequence>

<sequence>

<taxon idref="Zebrafish"/>

AACTGCAATATACGCGAATATTATCTATGTAGTGAAATGAGCCAGCCCCCGGGGAAATTCACGGG  
GGAAGTAAAAGTATGCTGGAGACGCGAAAGAATGTGCAAGCGCACTTTTCGGCCGTGCTAGCATT  
TCACGAGTAACAACAAGCCACATCGAGTTCAGGTAGCACA

</sequence>

<sequence>

<taxon idref="Stickleback"/>

AACTATGACCTGTGCGAAAATGATCTCCGTAGCGAAACGAACCAGCCCCCGGGGAAATTCACGAG  
GGACCTGAAAAGTAAGCTGACCAACCCCAACAATGCGCAAGCGCCCTTCCGGCCGTGTAAGCAATA  
TCACGCTGTCTCCGCTA-TACCGGCGCATACGGGTGGCACA

</sequence>

<sequence>

<taxon idref="Fugu"/>

AACTAAGTCTTGCTGAAAAAAACTCAGTAGCGAAACGAACCAGCCCCCGAGGAAATTTACGGG  
GGACCCGAAAAGTAAGCTGCCCGACCGCAAAAAGTGTAAGCGCCCATCCGGACGCGCAAGCACGA  
TCAAGCTTCTCACAA-CACTACCGACTACGGGTGGCACA

</sequence>

<sequence>

Supplementary File S5.xml  
<taxon idref="Japanese"/>

AACTGATAACAATGCGAAAATGATCTCCGTAGCGAAACGAACCAGCCCCCGGGGAAATTCACGAG  
GGCACTAAATAGTAAGCTGACCCTCCAAAAAACGCGCAGGCGCACTTTCGGCCGCGCAAGCACTA  
TCACGCAGCATCCTCGGGCCCAAACGGATGCGGGTGGTACA  
</sequence>  
<sequence>  
<taxon idref="2n28"/>

AACTACAATCTACGCGAATATGATCTTCGTAGCGAAACGACCCAGCCCCCGGGGTAATTCACGAG  
GGAAGTAAAAGTAAGGTAAAGCTCCCCAGCAACGCGCAAGCGCTCTTCCGGCCGCGTAAGCATT  
TCACGCTGCCACAGCAACCACCAACGCCTACAGGTGGCACA  
</sequence>  
<sequence>  
<taxon idref="2n31"/>

AACTGCAATCTACGCGAATATGATCTTCGTAGCGAAACGACCCAGCCCCCGGGGTAATTCACGAG  
GAAAGTAAAAGTAAGGTAAAGCTCCCCAGCAACGCGCAAGCGCCCTTCCGGCCGCGTAAGCACTA  
TCACGCTGCCGAGCAACCACCAACGCCTACAGGTGGCACA  
</sequence>  
<sequence>  
<taxon idref="2n38XY"/>

AACTGCAATCTACGCGAATATGATCTCCGTAGCGAAACGACCCAGCCCCCGGGGTAATTCACGAG  
GGAAGTAAAAGTAAGGTAAAGTTCGCCAGTAACGCGCAAGCGCCCTTCCGGCCGCGAAAGCACTA  
TCACGCTGCCACAGCAACCGTAACGCCTACAGGTGGCACA  
</sequence>  
<sequence>  
<taxon idref="2n38"/>

AACTGCAATCTACGCGAATATGATCTCCGTAGCGAAACGACCCAGCCCCCGGGGTAATTCACGAG  
GGAAGTAAAAGTAAGGTAAAGTTCGCCAGTAACGCGCAAGCGCCCTTCCGGCCGCGAAAGCACTA  
TCACGCTGCCACAGCAACCGTAACGCCTACAGGTGGCACA  
</sequence>  
</alignment>

<!-- The sequence alignment (each sequence refers to a  
taxon above). -->

<!-- ntax=13 nchar=173  
-->

<alignment id="alignment8" dataType="nucleotide">  
<sequence>  
<taxon idref="Medaka"/>

TACATTCTTTTGTGTGCCTCTCGCAGTTCGTGTATACTCTTCTTCAAACGCTACCCAATTTACCC  
CCCTTTTCGCCACGTCGAGATAATCACTCCTTTCTCTATGTCCTACGTCATTAGTATCCGTTTCC  
GAATCCTCTTTATCCAT-CTTTCCTGTTCTTCGGGGGTAAC  
</sequence>  
<sequence>  
<taxon idref="Carp"/>

TACAGGCCTTGGTGTGCCTCTCGCAGTTCGTGTATACTCTCCTTCAAACGCTACCCAATTCACCC  
CCTTTTCGCCACGTCGAGGTAATCACTCGCTTTCCTCTATGTCCTATGTCATTAGTATTCGTTTCC  
GAATCCTCTTTACCACTACTTTCTTGTCCTTGGGGGTAAC  
</sequence>

Supplementary File S5.xml

<sequence>  
<taxon idref="Tetraodon"/>

TGCATCCCTTTGTTTGCCTCCCGCAGTTCGTGTATACTCTTCTTCAAACGCTACCCAATTCACCC  
CCTTTTCGCCACGTCGAGATAATCACTCCCTTTTCTCTATGTCCTACGTCATTAGTATCCGTTTCC  
GAATCCTCTTTATACA-ACCTTTTGTTCCTTGGGGGTAAC

</sequence>  
<sequence>  
<taxon idref="salmon"/>

TACATTCTTTCGTGTGCTTCTCGCAGTTCGTGTATACTCTTCTTCAACACGCTACCCAATTCACCC  
CCTTTTCGCCACGTTGAGATAATCACTCCCCTTTCTCTATGTCCTATGTCATTAGTATCCGTTTCC  
GAATCCTCTTTATCCCTACCTTTCTGTTCCCTTGGGGGTAAC

</sequence>  
<sequence>  
<taxon idref="Rainbow"/>

TACATTCTTTCGTGTGCTTCTCGCAGTTCGTGTATACTCTTCTTCAAACGCTACCCAATTCACCC  
CCTTTTCGCCACGTTGAGATAATCACTCCCCTTTCTCTATGTCCTATGTCATTAGTATCCGTTTCC  
GAATCCTCTTTATCCCTACCTTTCTGTTCCCTTGGGGGTAAC

</sequence>  
<sequence>  
<taxon idref="Zebrafish"/>

TACATTTTTTCGTGTGCCTCTCGCAGTTCGTGTATACTCTTCTTCAAACGCTACCCAATTTACCC  
CCTTTTCGCCACGTCGAGATCGTCGCCCGCCTTTCTCTATGTCCTATGTCATTAGTATTCGTTTCC  
GAATCCTCTTTACCACCACTTTCCTGTCCCTTGGGGGTAAC

</sequence>  
<sequence>  
<taxon idref="stickleback"/>

TACTTTCCTTTGTGTGCCTCTCGCAGTTCGTGTATACTCTTCTTCAAACGCTACCCAATTCACCG  
CCTTTTCGCCACGTCGAGATAATCACTCTCTTCTCTATGTCCTACGTCATTAGTATCCGTTTCC  
GAATCCTCTTTATACC-ACCTTTTGTCCCTTGGGGGTAAC

</sequence>  
<sequence>  
<taxon idref="Fugu"/>

TACATCCCTTTGTTTGCCTCCCGCAGTTCGTGTATACTCTTCTTCAAACGCTACCCAATTCACCC  
CCCTTTCCCCACGTCGAGATAACCACTCCCTTCTCTATGTCCTACGTCATTAGTATCCGTTTCC  
GAATCCTCTTTATACA-AACTTTTCTTCTTTGGGGGTAAC

</sequence>  
<sequence>  
<taxon idref="Japanese"/>

TACATCTTTTCGTGTGCCTCTCGCAGTTCGTGTATACTCTTCTTCAAACGCTACCCAATTCACCC  
CCTTTTCCCCACGTCGAGATAATCACTTCCCTTCTGTATGTCCTATGTCATTAGTATCCGTTTCC  
GAATCCTCTTAATCCGTAACCTTTTGTTCCTTGGGGGTAAC

</sequence>  
<sequence>  
<taxon idref="2n28"/>

TACATTTTTTCGTGTGCCTCTCGCAGTTCGTGTATACTCTTCTTCAAACGCTACCCAATTCACCC  
CCCTTTCGCCACGTTGAGATACTCACTCTTCTCTATGTCCTATGTCATTAGTATCCGTTTCC  
GAATCCTCTTTATCCTCACCTTCTGTTCCCTTGGGGGTAAC

</sequence>

Supplementary File S5.xml

```
<sequence>  
  <taxon idref="2n31"/>
```

```
TACATTTTTTCGTGTGCCTCTCGCAGTTCGTGTATACTCTTCTTCAAACGCTACCCAATTCACCC  
CCCTTCGCCACGTTGAGATAATCACTCTCTTCTCTCTATGTCCTATGTCATTAGTATCCGTTTCC  
GAATCCTCTTTATCCTCACCTTCTGTTCCCTTGGGGGTAAC
```

```
</sequence>  
<sequence>  
  <taxon idref="2n38XY"/>
```

```
TACATTTTTTCGTGTGCCTCTCGCAGTTCGTGTATACTCTTCTTCAAACGCTACCCAATTCACCC  
CCCTTCGCCACGTTGAGATAATCACTCTCTTCTCTCTATGTCCTATGTCATTAGTATCCGTTTCC  
GAATCCTCTTTATCCTCACCTTCTGTTCCCTTGGGGGTAAC
```

```
</sequence>  
<sequence>  
  <taxon idref="2n38"/>
```

```
TACATTTTTTCGTGTGCCTCTCGCAGTTCGTGTATACTCTTCTTCAAACGCTACCCAATTCACCC  
CCCTTCGCCACGTTGAGATAATCACTCTCTTCTCTCTATGTCCTATGTCATTAGTATCCGTTTCC  
GAATCCTCTTTATCCTCACCTTCTGTTCCCTTGGGGGTAAC
```

```
</sequence>  
</alignment>
```

```
<!-- The sequence alignment (each sequence refers to a  
taxon above). -->
```

```
<!-- ntax=13 nchar=172  
-->
```

```
<alignment id="alignment9" dataType="nucleotide">  
  <sequence>  
    <taxon idref="Medaka"/>
```

```
GTCCTATATGCACCATAAATCTACGGAAAGCTAATACCCAATGCATTCCACAATTCATTATAACT  
TTTCATCCATTTAGTTAATTGCCTCTTAAAGCCCCACAAAACCTTTTGTTAATAAGTAAACACATC  
AAATACCCCCCGCTTA-CCATTCCAACCAACCGGTCACC
```

```
</sequence>  
<sequence>  
  <taxon idref="Carp"/>
```

```
GCATGCACAACCAGAACCCTTCTCACATAGCAATTGAACCCAGAATCCCTAAAATAATCACACCC  
GAACACACAATCAAAAAACCTCGGCCCAATATCAATATATAAACCAAAGTAAAACGAAACCATC  
AAACCAAGTTCAAAACCCAGAAAAAATACAATAAAGAATA
```

```
</sequence>  
<sequence>  
  <taxon idref="Tetraodon"/>
```

```
GCTCTACCGATCACACAACCACCCCAATCAACAACCCCTTCGACACCCAAAAGCACATCCAACCA  
ACACACACACCAAGCAGAAGAAAACCTCCAATTTGCAATAACAACCAACCAACACACCCCA  
AAGCACTCCCATAAC-CAAGCCCAAGAAAACACAACACA
```

```
</sequence>  
<sequence>  
  <taxon idref="salmon"/>
```

```
GCCCATCCATTCACACACCCCCCACTAAACAACCTTCTTCACAAAACCAAATATACATTA AAAAC  
AAACCCCTCCCAAAAAACCGACCTAACCATAACTATCAACTCCAAAACAAATACCAAACCAT  
AAGCATCATATAACATCCTTACTGACTAAATAACAAACTA
```



Supplementary File S5.xml

```
</sequence>  
<sequence>  
  <taxon idref="Rainbow"/>
```

```
GCCCACCCATTCAAACACCCTCCCCAATAAACAACTCACTCGCAGAACCCAACAAACGTTGAAACC  
AAACTTCCCCCAACGAAATCGAACAAATAAAAACCCCATAAACTCCAAAACCTGATACTAAACGGC  
AAACACTATATAACACCTTCATCACCTAAATGACATATTA  
  </sequence>  
<sequence>  
  <taxon idref="Zebrafish"/>
```

```
GCTTCTATAACCATAACAATTTTACATACAAAAATTTAATCTAAAAACAGAAACCAACCTTATTC  
AAATACATAATCATAAAGTTATAACACCTAAAGTAGTCACTAAAATTAATAATTAATGGAAATGAC  
AAATCAAAATCAGCACTCTTTTAAAATTCTCTAGACATCA  
  </sequence>  
<sequence>  
  <taxon idref="Stickleback"/>
```

```
GCCCTACCTCCTACACCCCACACCCGTCAAAGGGTTTTTTACGAACCCTGAAAACCACTCATAA  
CTATTTCTACTAGGAAAAATAAACCTTAACACCAACCACTCACTAAAATTAACACAAATATA  
AAAAATCTATACTTAA-CCCTCTAACCCCTCACATCTCA  
  </sequence>  
<sequence>  
  <taxon idref="Fugu"/>
```

```
GCTTTTCCTATCGGATATTATCCACAATAAGCAATCCATTCCAACAACCAATACTAACCCTATCA  
AACCCCATACCCAAACAAGAGATCCACAACATCTAACAATAACACCCACAAAAAACTATATCGCA  
AAACAACCTAAATATT-CAACACCCCCCATCCAAGCATA  
  </sequence>  
<sequence>  
  <taxon idref="Japanese"/>
```

```
GCATATCCAAACGAACCGCACTCACAACCAAGATTAGTTTTTACACCCAATAAAAAACCTAACAA  
AAAAATACAATAATAAAAACAAATCAACCATACTCAATAAAACAATTAAAACAACACACAAACGAA  
AAAAACACATCACGAAAAGAAATAAAAATCCAAAACAGCA  
  </sequence>  
<sequence>  
  <taxon idref="2n28"/>
```

```
GTATTTTCAAACCCCGCAATCCCCCAGCCAAATACCCAGTCAAACACCCCAAAGTACATTCAAACA  
CATTATACACCCATAAAATTTACCCCATCATCCAACAATACCAACCACCACTACTCATACTTAAC  
AAACCCCCCGCACCATAACCAAAACAACCCATAAAACACA  
  </sequence>  
<sequence>  
  <taxon idref="2n31"/>
```

```
GTATCTTCAAACCCTGCAACCCCCAGCCAAATACCCAGCCAAACACCCCAAAGTACATCTAAACA  
CATTATACACCCATAAAATTTACCCCATCACCCAACAATACCAACCATCACTACTCATACTTACC  
GAACCCCCCGCACCATAAATAAGCACCCGCATAAAAAACA  
  </sequence>  
<sequence>  
  <taxon idref="2n38XY"/>
```

```
GTACCTCTAGACCCAGTAACCCCCCGCTCAGGTATCCACCCGCACACCCAAGAATACACTTCAGCA  
CATCATACACCCATGAAACTCCACCCTACCATCCTTCAATGCCACCCTATCACTCACACCCAAT  
AAACCACTCACATCATAGCCAACCTAAAACACCCAAAACA
```

```
Supplementary File S5.xml
</sequence>
<sequence>
  <taxon idref="2n38"/>
```

```
GTACCTCTAGACCCAGTAACCCCCCGCTCAGGTATCCACCCGCACACCCAAGAATACACTTCAGCA
CATCATAACCCATGAAACTCCACCCTACCATCCTTCAATGCCACCACACTATCACTCACACCCAAT
AAACCACTCACATCATAGCCAACCTAAAACACCCAAAACA
  </sequence>
</alignment>
```

```
<!-- The unique patterns from 1 to end
  -->
<!-- npatterns=91
  -->
<patterns id="ATPase.1st.patterns" from="1">
  <alignment idref="alignment1"/>
</patterns>
```

```
<!-- The unique patterns from 1 to end
  -->
<!-- npatterns=87
  -->
<patterns id="ATPase.2nd.patterns" from="1">
  <alignment idref="alignment2"/>
</patterns>
```

```
<!-- The unique patterns from 1 to end
  -->
<!-- npatterns=188
  -->
<patterns id="ATPase.3rd.patterns" from="1">
  <alignment idref="alignment3"/>
</patterns>
```

```
<!-- The unique patterns from 1 to end
  -->
<!-- npatterns=18
  -->
<patterns id="Cytb.1st.patterns" from="1">
  <alignment idref="alignment4"/>
</patterns>
```

```
<!-- The unique patterns from 1 to end
  -->
<!-- npatterns=108
  -->
<patterns id="Cytb.2nd.patterns" from="1">
  <alignment idref="alignment5"/>
</patterns>
```

Supplementary File S5.xml

```

<!-- The unique patterns from 1 to end
-->
<!-- npatterns=29
-->
<patterns id="Cytb.3rd.patterns" from="1">
  <alignment idref="alignment6"/>
</patterns>

<!-- The unique patterns from 1 to end
-->
<!-- npatterns=95
-->
<patterns id="ND2.1st.patterns" from="1">
  <alignment idref="alignment7"/>
</patterns>

<!-- The unique patterns from 1 to end
-->
<!-- npatterns=51
-->
<patterns id="ND2.2nd.patterns" from="1">
  <alignment idref="alignment8"/>
</patterns>

<!-- The unique patterns from 1 to end
-->
<!-- npatterns=162
-->
<patterns id="ND2.3rd.patterns" from="1">
  <alignment idref="alignment9"/>
</patterns>

<!-- A prior assumption that the population size has
remained constant -->
<!-- throughout the time spanned by the genealogy.
-->
<constantSize id="constant" units="substitutions">
  <populationSize>
    <parameter id="constant.popSize"
value="26.0" lower="0.0" upper="400.0"/>
  </populationSize>
</constantSize>

<!-- Generate a random starting tree under the coalescent
process -->
<!-- Has calibration
-->
<coalescentTree id="startingTree">
  <constrainedTaxa>
    <taxa idref="taxa"/>
    <tmrca monophyletic="true">
      <taxa idref="28_31"/>
    </tmrca>
  </constrainedTaxa>
</coalescentTree>

```

Supplementary File S5.xml

```

    <tmrca monophyletic="true">
      <taxa idref="38_38XY"/>
    </tmrca>
    <tmrca monophyletic="true">
      <taxa idref="Clupeocephala"/>
      <uniformDistributionModel>
        <lower>149.85</lower>
        <upper>165.2</upper>
      </uniformDistributionModel>
    </tmrca>
    <tmrca monophyletic="true">
      <taxa idref="Fugus"/>
      <uniformDistributionModel>
        <lower>32.5</lower>
        <upper>56.0</upper>
      </uniformDistributionModel>
    </tmrca>
    <tmrca monophyletic="false">
      <taxa idref="Medaka_Fugus"/>
      <uniformDistributionModel>
        <lower>96.9</lower>
        <upper>150.9</upper>
      </uniformDistributionModel>
    </tmrca>
    <tmrca monophyletic="false">
      <taxa idref="Eigenmannias"/>
    </tmrca>
  </constrainedTaxa>
  <constantSize idref="constant"/>
</coalescentTree>

<!-- Generate a tree model
-->
<treeModel id="treeModel">
  <coalescentTree idref="startingTree"/>
  <rootHeight>
    <parameter id="treeModel.rootHeight"/>
  </rootHeight>
  <nodeHeights internalNodes="true">
    <parameter
id="treeModel.internalNodeHeights"/>
  </nodeHeights>
  <nodeHeights internalNodes="true" rootNode="true">
    <parameter
id="treeModel.allInternalNodeHeights"/>
  </nodeHeights>
</treeModel>

<!-- Generate a coalescent likelihood
-->
<coalescentLikelihood id="coalescent">
  <model>
    <constantSize idref="constant"/>
  </model>
  <populationTree>
    <treeModel idref="treeModel"/>

```

```

    </populationTree>
  </coalescentLikelihood>

  <!-- The uncorrelated relaxed clock (Drummond, Ho,
Phillips & Rambaut, 2006) -->
  <discretizedBranchRates id="branchRates">
    <treeModel idref="treeModel"/>
    <distribution>
      <logNormalDistributionModel
meanInRealSpace="true">
        <mean>
          <parameter id="ucld.mean"
value="0.014" lower="0.0" upper="100.0"/>
        </mean>
        <stdev>
          <parameter id="ucld.stdev"
value="0.1" lower="0.0" upper="10.0"/>
        </stdev>
      </logNormalDistributionModel>
    </distribution>
    <rateCategories>
      <parameter id="branchRates.categories"
dimension="24"/>
    </rateCategories>
  </discretizedBranchRates>

  <rateStatistic id="meanRate" name="meanRate" mode="mean"
internal="true" external="true">
    <treeModel idref="treeModel"/>
    <discretizedBranchRates idref="branchRates"/>
  </rateStatistic>

  <rateStatistic id="coefficientOfVariation"
name="coefficientOfVariation" mode="coefficientOfVariation"
internal="true" external="true">
    <treeModel idref="treeModel"/>
    <discretizedBranchRates idref="branchRates"/>
  </rateStatistic>

  <rateCovarianceStatistic id="covariance"
name="covariance">
    <treeModel idref="treeModel"/>
    <discretizedBranchRates idref="branchRates"/>
  </rateCovarianceStatistic>

  <!-- The HKY substitution model (Hasegawa, Kishino & Yano,
1985) -->
  <HKYModel id="ATPase.1st.hky">
    <frequencies>
      <frequencyModel dataType="nucleotide">
        <frequencies>
          <parameter
id="ATPase.1st.frequencies" value="0.25 0.25 0.25 0.25"/>
        </frequencies>
      </frequencyModel>
    </frequencies>
  </HKYModel>

```

Supplementary File S5.xml

```

    <kappa>
      <parameter id="ATPase.1st.kappa"
value="1.0" lower="1.0E-8" upper="100.0"/>
    </kappa>
  </HKYModel>

  <!-- The general time reversible (GTR) substitution model
-->
  <gtrModel id="ATPase.2nd.gtr">
    <frequencies>
      <frequencyModel dataType="nucleotide">
        <frequencies>
          <parameter
id="ATPase.2nd.frequencies" value="0.25 0.25 0.25 0.25"/>
        </frequencies>
      </frequencyModel>
    </frequencies>
    <rateAC>
      <parameter id="ATPase.2nd.ac" value="1.0"
lower="1.0E-8" upper="100.0"/>
    </rateAC>
    <rateAG>
      <parameter id="ATPase.2nd.ag" value="1.0"
lower="1.0E-8" upper="100.0"/>
    </rateAG>
    <rateAT>
      <parameter id="ATPase.2nd.at" value="1.0"
lower="1.0E-8" upper="100.0"/>
    </rateAT>
    <rateCG>
      <parameter id="ATPase.2nd.cg" value="1.0"
lower="1.0E-8" upper="100.0"/>
    </rateCG>
    <rateGT>
      <parameter id="ATPase.2nd.gt" value="1.0"
lower="1.0E-8" upper="100.0"/>
    </rateGT>
  </gtrModel>

  <!-- The HKY substitution model (Hasegawa, Kishino & Yano,
1985)
-->
  <HKYModel id="ATPase.3rd.hky">
    <frequencies>
      <frequencyModel dataType="nucleotide">
        <frequencies>
          <parameter
id="ATPase.3rd.frequencies" value="0.25 0.25 0.25 0.25"/>
        </frequencies>
      </frequencyModel>
    </frequencies>
    <kappa>
      <parameter id="ATPase.3rd.kappa"
value="1.0" lower="1.0E-8" upper="100.0"/>
    </kappa>
  </HKYModel>

```

Supplementary File S5.xml

1985) <!-- The HKY substitution model (Hasegawa, Kishino & Yano, -->  
 <HKYModel id="Cytb.1st.hky">  
 <frequencies>  
 <frequencyModel dataType="nucleotide">  
 <frequencies>  
 <parameter  
 id="Cytb.1st.frequencies" value="0.25 0.25 0.25 0.25"/>  
 </frequencies>  
 </frequencyModel>  
 </frequencies>  
 <kappa>  
 <parameter id="Cytb.1st.kappa" value="1.0"  
 lower="1.0E-8" upper="100.0"/>  
 </kappa>  
 </HKYModel>

<!-- The general time reversible (GTR) substitution model -->  
 <gtrModel id="Cytb.2nd.gtr">  
 <frequencies>  
 <frequencyModel dataType="nucleotide">  
 <frequencies>  
 <parameter  
 id="Cytb.2nd.frequencies" value="0.25 0.25 0.25 0.25"/>  
 </frequencies>  
 </frequencyModel>  
 </frequencies>  
 <rateAC>  
 <parameter id="Cytb.2nd.ac" value="1.0"  
 lower="1.0E-8" upper="100.0"/>  
 </rateAC>  
 <rateAG>  
 <parameter id="Cytb.2nd.ag" value="1.0"  
 lower="1.0E-8" upper="100.0"/>  
 </rateAG>  
 <rateAT>  
 <parameter id="Cytb.2nd.at" value="1.0"  
 lower="1.0E-8" upper="100.0"/>  
 </rateAT>  
 <rateCG>  
 <parameter id="Cytb.2nd.cg" value="1.0"  
 lower="1.0E-8" upper="100.0"/>  
 </rateCG>  
 <rateGT>  
 <parameter id="Cytb.2nd.gt" value="1.0"  
 lower="1.0E-8" upper="100.0"/>  
 </rateGT>  
 </gtrModel>

1985) <!-- The HKY substitution model (Hasegawa, Kishino & Yano, -->  
 <HKYModel id="Cytb.3rd.hky">  
 <frequencies>  
 <frequencyModel dataType="nucleotide">  
 <frequencies>

Supplementary File S5.xml

```

        <parameter
id="Cytb.3rd.frequencies" value="0.25 0.25 0.25 0.25"/>
        </frequencies>
    </frequencyModel>
</frequencies>
<kappa>
    <parameter id="Cytb.3rd.kappa" value="1.0"
lower="1.0E-8" upper="100.0"/>
    </kappa>
</HKYModel>

<!-- The general time reversible (GTR) substitution model
-->
<gtrModel id="ND2.1st.gtr">
    <frequencies>
        <frequencyModel dataType="nucleotide">
            <frequencies>
                <parameter
id="ND2.1st.frequencies" value="0.25 0.25 0.25 0.25"/>
                </frequencies>
            </frequencyModel>
        </frequencies>
        <rateAC>
            <parameter id="ND2.1st.ac" value="1.0"
lower="1.0E-8" upper="100.0"/>
            </rateAC>
        <rateAG>
            <parameter id="ND2.1st.ag" value="1.0"
lower="1.0E-8" upper="100.0"/>
            </rateAG>
        <rateAT>
            <parameter id="ND2.1st.at" value="1.0"
lower="1.0E-8" upper="100.0"/>
            </rateAT>
        <rateCG>
            <parameter id="ND2.1st.cg" value="1.0"
lower="1.0E-8" upper="100.0"/>
            </rateCG>
        <rateGT>
            <parameter id="ND2.1st.gt" value="1.0"
lower="1.0E-8" upper="100.0"/>
            </rateGT>
    </gtrModel>

<!-- The general time reversible (GTR) substitution model
-->
<gtrModel id="ND2.2nd.gtr">
    <frequencies>
        <frequencyModel dataType="nucleotide">
            <frequencies>
                <parameter
id="ND2.2nd.frequencies" value="0.25 0.25 0.25 0.25"/>
                </frequencies>
            </frequencyModel>
        </frequencies>
        <rateAC>

```



Supplementary File S5.xml

```

        <parameter id="ND2.2nd.ac" value="1.0"
lower="1.0E-8" upper="100.0"/>
        </rateAC>
        <rateAG>
        <parameter id="ND2.2nd.ag" value="1.0"
lower="1.0E-8" upper="100.0"/>
        </rateAG>
        <rateAT>
        <parameter id="ND2.2nd.at" value="1.0"
lower="1.0E-8" upper="100.0"/>
        </rateAT>
        <rateCG>
        <parameter id="ND2.2nd.cg" value="1.0"
lower="1.0E-8" upper="100.0"/>
        </rateCG>
        <rateGT>
        <parameter id="ND2.2nd.gt" value="1.0"
lower="1.0E-8" upper="100.0"/>
        </rateGT>
    </gtrModel>

    <!-- The HKY substitution model (Hasegawa, Kishino & Yano,
1985)
        -->
    <HKYModel id="ND2.3rd.hky">
        <frequencies>
            <frequencyModel dataType="nucleotide">
                <frequencies>
                    <parameter
id="ND2.3rd.frequencies" value="0.25 0.25 0.25 0.25"/>
                </frequencies>
            </frequencyModel>
        </frequencies>
        <kappa>
            <parameter id="ND2.3rd.kappa" value="1.0"
lower="1.0E-8" upper="100.0"/>
        </kappa>
    </HKYModel>

    <!-- site model
        -->
    <siteModel id="ATPase.1st.siteModel">
        <substitutionModel>
            <HKYModel idref="ATPase.1st.hky"/>
        </substitutionModel>
        <gammaShape gammaCategories="4">
            <parameter id="ATPase.1st.alpha"
value="0.5" lower="0.0" upper="100.0"/>
        </gammaShape>
    </siteModel>

    <!-- site model
        -->
    <siteModel id="ATPase.2nd.siteModel">
        <substitutionModel>
            <gtrModel idref="ATPase.2nd.gtr"/>
        </substitutionModel>

```

```

Supplementary File S5.xml
  <gammaShape gammaCategories="4">
    <parameter id="ATPase.2nd.alpha"
value="0.5" lower="0.0" upper="100.0"/>
  </gammaShape>
</siteModel>

<!-- site model
-->
<siteModel id="ATPase.3rd.siteModel">
  <substitutionModel>
    <HKYModel idref="ATPase.3rd.hky"/>
  </substitutionModel>
  <gammaShape gammaCategories="4">
    <parameter id="ATPase.3rd.alpha"
value="0.5" lower="0.0" upper="100.0"/>
  </gammaShape>
  <proportionInvariant>
    <parameter id="ATPase.3rd.pInv"
value="0.5" lower="0.0" upper="1.0"/>
  </proportionInvariant>
</siteModel>

<!-- site model
-->
<siteModel id="Cytb.1st.siteModel">
  <substitutionModel>
    <HKYModel idref="Cytb.1st.hky"/>
  </substitutionModel>
  <proportionInvariant>
    <parameter id="Cytb.1st.pInv" value="0.5"
lower="0.0" upper="1.0"/>
  </proportionInvariant>
</siteModel>

<!-- site model
-->
<siteModel id="Cytb.2nd.siteModel">
  <substitutionModel>
    <gtrModel idref="Cytb.2nd.gtr"/>
  </substitutionModel>
  <gammaShape gammaCategories="4">
    <parameter id="Cytb.2nd.alpha" value="0.5"
lower="0.0" upper="100.0"/>
  </gammaShape>
  <proportionInvariant>
    <parameter id="Cytb.2nd.pInv" value="0.5"
lower="0.0" upper="1.0"/>
  </proportionInvariant>
</siteModel>

<!-- site model
-->
<siteModel id="Cytb.3rd.siteModel">
  <substitutionModel>
    <HKYModel idref="Cytb.3rd.hky"/>
  </substitutionModel>

```

```

Supplementary File S5.xml
  <gammaShape gammaCategories="4">
    <parameter id="Cytb.3rd.alpha" value="0.5"
lower="0.0" upper="100.0"/>
  </gammaShape>
</siteModel>

<!-- site model
-->
<siteModel id="ND2.1st.siteModel">
  <substitutionModel>
    <gtrModel idref="ND2.1st.gtr"/>
  </substitutionModel>
  <gammaShape gammaCategories="4">
    <parameter id="ND2.1st.alpha" value="0.5"
lower="0.0" upper="100.0"/>
  </gammaShape>
</siteModel>

<!-- site model
-->
<siteModel id="ND2.2nd.siteModel">
  <substitutionModel>
    <gtrModel idref="ND2.2nd.gtr"/>
  </substitutionModel>
  <proportionInvariant>
    <parameter id="ND2.2nd.pInv" value="0.5"
lower="0.0" upper="1.0"/>
  </proportionInvariant>
</siteModel>

<!-- site model
-->
<siteModel id="ND2.3rd.siteModel">
  <substitutionModel>
    <HKYModel idref="ND2.3rd.hky"/>
  </substitutionModel>
  <gammaShape gammaCategories="4">
    <parameter id="ND2.3rd.alpha" value="0.5"
lower="0.0" upper="100.0"/>
  </gammaShape>
  <proportionInvariant>
    <parameter id="ND2.3rd.pInv" value="0.5"
lower="0.0" upper="1.0"/>
  </proportionInvariant>
</siteModel>

  <treeLikelihood id="ATPase.1st.ATPase.1st.treeLikelihood"
useAmbiguities="false">
    <patterns idref="ATPase.1st.patterns"/>
    <treeModel idref="treeModel"/>
    <siteModel idref="ATPase.1st.siteModel"/>
    <discretizedBranchRates idref="branchRates"/>
  </treeLikelihood>

  <treeLikelihood id="ATPase.2nd.ATPase.2nd.treeLikelihood"
useAmbiguities="false">

```

```

Supplementary File S5.xml
  <patterns idref="ATPase.2nd.patterns"/>
  <treeModel idref="treeModel"/>
  <siteModel idref="ATPase.2nd.siteModel"/>
  <discretizedBranchRates idref="branchRates"/>
</treeLikelihood>

  <treeLikelihood id="ATPase.3rd.ATPase.3rd.treeLikelihood"
useAmbiguities="false">
  <patterns idref="ATPase.3rd.patterns"/>
  <treeModel idref="treeModel"/>
  <siteModel idref="ATPase.3rd.siteModel"/>
  <discretizedBranchRates idref="branchRates"/>
</treeLikelihood>

  <treeLikelihood id="Cytb.1st.Cytb.1st.treeLikelihood"
useAmbiguities="false">
  <patterns idref="Cytb.1st.patterns"/>
  <treeModel idref="treeModel"/>
  <siteModel idref="Cytb.1st.siteModel"/>
  <discretizedBranchRates idref="branchRates"/>
</treeLikelihood>

  <treeLikelihood id="Cytb.2nd.Cytb.2nd.treeLikelihood"
useAmbiguities="false">
  <patterns idref="Cytb.2nd.patterns"/>
  <treeModel idref="treeModel"/>
  <siteModel idref="Cytb.2nd.siteModel"/>
  <discretizedBranchRates idref="branchRates"/>
</treeLikelihood>

  <treeLikelihood id="Cytb.3rd.Cytb.3rd.treeLikelihood"
useAmbiguities="false">
  <patterns idref="Cytb.3rd.patterns"/>
  <treeModel idref="treeModel"/>
  <siteModel idref="Cytb.3rd.siteModel"/>
  <discretizedBranchRates idref="branchRates"/>
</treeLikelihood>

  <treeLikelihood id="ND2.1st.ND2.1st.treeLikelihood"
useAmbiguities="false">
  <patterns idref="ND2.1st.patterns"/>
  <treeModel idref="treeModel"/>
  <siteModel idref="ND2.1st.siteModel"/>
  <discretizedBranchRates idref="branchRates"/>
</treeLikelihood>

  <treeLikelihood id="ND2.2nd.ND2.2nd.treeLikelihood"
useAmbiguities="false">
  <patterns idref="ND2.2nd.patterns"/>
  <treeModel idref="treeModel"/>
  <siteModel idref="ND2.2nd.siteModel"/>
  <discretizedBranchRates idref="branchRates"/>
</treeLikelihood>

  <treeLikelihood id="ND2.3rd.ND2.3rd.treeLikelihood"
useAmbiguities="false">

```

```

Supplementary File S5.xml
  <patterns idref="ND2.3rd.patterns"/>
  <treeModel idref="treeModel"/>
  <siteModel idref="ND2.3rd.siteModel"/>
  <discretizedBranchRates idref="branchRates"/>
</treeLikelihood>

<tmrcaStatistic id="tmrca(28_31)">
  <mrca>
    <taxa idref="28_31"/>
  </mrca>
  <treeModel idref="treeModel"/>
</tmrcaStatistic>
<monophylyStatistic id="monophyly(28_31)">
  <mrca>
    <taxa idref="28_31"/>
  </mrca>
  <treeModel idref="treeModel"/>
</monophylyStatistic>
<tmrcaStatistic id="tmrca(38_38XY)">
  <mrca>
    <taxa idref="38_38XY"/>
  </mrca>
  <treeModel idref="treeModel"/>
</tmrcaStatistic>
<monophylyStatistic id="monophyly(38_38XY)">
  <mrca>
    <taxa idref="38_38XY"/>
  </mrca>
  <treeModel idref="treeModel"/>
</monophylyStatistic>
<tmrcaStatistic id="tmrca(Clupeocephala)">
  <mrca>
    <taxa idref="Clupeocephala"/>
  </mrca>
  <treeModel idref="treeModel"/>
</tmrcaStatistic>
<monophylyStatistic id="monophyly(Clupeocephala)">
  <mrca>
    <taxa idref="Clupeocephala"/>
  </mrca>
  <treeModel idref="treeModel"/>
</monophylyStatistic>
<tmrcaStatistic id="tmrca(Fugus)">
  <mrca>
    <taxa idref="Fugus"/>
  </mrca>
  <treeModel idref="treeModel"/>
</tmrcaStatistic>
<monophylyStatistic id="monophyly(Fugus)">
  <mrca>
    <taxa idref="Fugus"/>
  </mrca>
  <treeModel idref="treeModel"/>
</monophylyStatistic>
<tmrcaStatistic id="tmrca(Medaka_Fugus)">

```

Supplementary File S5.xml

```

    <mrca>
      <taxa idref="Medaka_Fugus"/>
    </mrca>
    <treeModel idref="treeModel"/>
  </tmrcaStatistic>
  <tmrcaStatistic id="tmrca(Eigenmannias)">
    <mrca>
      <taxa idref="Eigenmannias"/>
    </mrca>
    <treeModel idref="treeModel"/>
  </tmrcaStatistic>
  <!-- Define operators
    -->
  <operators id="operators">
    <scaleOperator scaleFactor="0.75" weight="1">
      <parameter idref="ATPase.1st.kappa"/>
    </scaleOperator>
    <scaleOperator scaleFactor="0.75" weight="1">
      <parameter idref="ATPase.1st.alpha"/>
    </scaleOperator>
    <deltaExchange delta="0.01" weight="1">
      <parameter
idref="ATPase.1st.frequencies"/>
    </deltaExchange>
    <scaleOperator scaleFactor="0.75" weight="1">
      <parameter idref="ATPase.2nd.ac"/>
    </scaleOperator>
    <scaleOperator scaleFactor="0.75" weight="1">
      <parameter idref="ATPase.2nd.ag"/>
    </scaleOperator>
    <scaleOperator scaleFactor="0.75" weight="1">
      <parameter idref="ATPase.2nd.at"/>
    </scaleOperator>
    <scaleOperator scaleFactor="0.75" weight="1">
      <parameter idref="ATPase.2nd.cg"/>
    </scaleOperator>
    <scaleOperator scaleFactor="0.75" weight="1">
      <parameter idref="ATPase.2nd.gt"/>
    </scaleOperator>
    <scaleOperator scaleFactor="0.75" weight="1">
      <parameter idref="ATPase.2nd.alpha"/>
    </scaleOperator>
    <deltaExchange delta="0.01" weight="1">
      <parameter
idref="ATPase.2nd.frequencies"/>
    </deltaExchange>
    <scaleOperator scaleFactor="0.75" weight="1">
      <parameter idref="ATPase.3rd.kappa"/>
    </scaleOperator>
    <scaleOperator scaleFactor="0.75" weight="1">
      <parameter idref="ATPase.3rd.alpha"/>
    </scaleOperator>
    <scaleOperator scaleFactor="0.75" weight="1">
      <parameter idref="ATPase.3rd.pInv"/>
    </scaleOperator>
    <deltaExchange delta="0.01" weight="1">

```

Supplementary File S5.xml

```

    <parameter
idref="ATPase.3rd.frequencies"/>
  </deltaExchange>
  <scaleOperator scaleFactor="0.75" weight="1">
    <parameter idref="Cytb.1st.kappa"/>
  </scaleOperator>
  <scaleOperator scaleFactor="0.75" weight="1">
    <parameter idref="Cytb.1st.pInv"/>
  </scaleOperator>
  <deltaExchange delta="0.01" weight="1">
    <parameter idref="Cytb.1st.frequencies"/>
  </deltaExchange>
  <scaleOperator scaleFactor="0.75" weight="1">
    <parameter idref="Cytb.2nd.ac"/>
  </scaleOperator>
  <scaleOperator scaleFactor="0.75" weight="1">
    <parameter idref="Cytb.2nd.ag"/>
  </scaleOperator>
  <scaleOperator scaleFactor="0.75" weight="1">
    <parameter idref="Cytb.2nd.at"/>
  </scaleOperator>
  <scaleOperator scaleFactor="0.75" weight="1">
    <parameter idref="Cytb.2nd.cg"/>
  </scaleOperator>
  <scaleOperator scaleFactor="0.75" weight="1">
    <parameter idref="Cytb.2nd.gt"/>
  </scaleOperator>
  <scaleOperator scaleFactor="0.75" weight="1">
    <parameter idref="Cytb.2nd.alpha"/>
  </scaleOperator>
  <scaleOperator scaleFactor="0.75" weight="1">
    <parameter idref="Cytb.2nd.pInv"/>
  </scaleOperator>
  <deltaExchange delta="0.01" weight="1">
    <parameter idref="Cytb.2nd.frequencies"/>
  </deltaExchange>
  <scaleOperator scaleFactor="0.75" weight="1">
    <parameter idref="Cytb.3rd.kappa"/>
  </scaleOperator>
  <scaleOperator scaleFactor="0.75" weight="1">
    <parameter idref="Cytb.3rd.alpha"/>
  </scaleOperator>
  <deltaExchange delta="0.01" weight="1">
    <parameter idref="Cytb.3rd.frequencies"/>
  </deltaExchange>
  <scaleOperator scaleFactor="0.75" weight="1">
    <parameter idref="ND2.1st.ac"/>
  </scaleOperator>
  <scaleOperator scaleFactor="0.75" weight="1">
    <parameter idref="ND2.1st.ag"/>
  </scaleOperator>
  <scaleOperator scaleFactor="0.75" weight="1">
    <parameter idref="ND2.1st.at"/>
  </scaleOperator>
  <scaleOperator scaleFactor="0.75" weight="1">
    <parameter idref="ND2.1st.cg"/>
  </scaleOperator>

```

Supplementary File S5.xml

```

</scaleOperator>
<scaleOperator scaleFactor="0.75" weight="1">
  <parameter idref="ND2.1st.gt"/>
</scaleOperator>
<scaleOperator scaleFactor="0.75" weight="1">
  <parameter idref="ND2.1st.alpha"/>
</scaleOperator>
<deltaExchange delta="0.01" weight="1">
  <parameter idref="ND2.1st.frequencies"/>
</deltaExchange>
<scaleOperator scaleFactor="0.75" weight="1">
  <parameter idref="ND2.2nd.ac"/>
</scaleOperator>
<scaleOperator scaleFactor="0.75" weight="1">
  <parameter idref="ND2.2nd.ag"/>
</scaleOperator>
<scaleOperator scaleFactor="0.75" weight="1">
  <parameter idref="ND2.2nd.at"/>
</scaleOperator>
<scaleOperator scaleFactor="0.75" weight="1">
  <parameter idref="ND2.2nd.cg"/>
</scaleOperator>
<scaleOperator scaleFactor="0.75" weight="1">
  <parameter idref="ND2.2nd.gt"/>
</scaleOperator>
<scaleOperator scaleFactor="0.75" weight="1">
  <parameter idref="ND2.2nd.pInv"/>
</scaleOperator>
<deltaExchange delta="0.01" weight="1">
  <parameter idref="ND2.2nd.frequencies"/>
</deltaExchange>
<scaleOperator scaleFactor="0.75" weight="1">
  <parameter idref="ND2.3rd.kappa"/>
</scaleOperator>
<scaleOperator scaleFactor="0.75" weight="1">
  <parameter idref="ND2.3rd.alpha"/>
</scaleOperator>
<scaleOperator scaleFactor="0.75" weight="1">
  <parameter idref="ND2.3rd.pInv"/>
</scaleOperator>
<deltaExchange delta="0.01" weight="1">
  <parameter idref="ND2.3rd.frequencies"/>
</deltaExchange>
<scaleOperator scaleFactor="0.75" weight="3">
  <parameter idref="uclid.mean"/>
</scaleOperator>
<scaleOperator scaleFactor="0.75" weight="3">
  <parameter idref="uclid.stdev"/>
</scaleOperator>
weight="15">
  <subtreeSlide size="2.6" gaussian="true"
    <treeModel idref="treeModel"/>
  </subtreeSlide>
<narrowExchange weight="15">
  <treeModel idref="treeModel"/>
</narrowExchange>

```



```

Supplementary File S5.xml
<wideExchange weight="3">
  <treeModel idref="treeModel"/>
</wideExchange>
<wilsonBalding weight="3">
  <treeModel idref="treeModel"/>
</wilsonBalding>
<scaleOperator scaleFactor="0.75" weight="3">
  <parameter idref="treeModel.rootHeight"/>
</scaleOperator>
<uniformOperator weight="30">
  <parameter
idref="treeModel.internalNodeHeights"/>
</uniformOperator>
<scaleOperator scaleFactor="0.75" weight="3">
  <parameter idref="constant.popSize"/>
</scaleOperator>
<upDownOperator scaleFactor="0.75" weight="3">
  <up>
    <parameter idref="ucld.mean"/>
  </up>
  <down>
    <parameter
idref="treeModel.allInternalNodeHeights"/>
  </down>
</upDownOperator>
<swapOperator size="1" weight="10"
autoOptimize="false">
  <parameter
idref="branchRates.categories"/>
</swapOperator>
<randomWalkIntegerOperator windowSize="1"
weight="10">
  <parameter
idref="branchRates.categories"/>
</randomWalkIntegerOperator>
<uniformIntegerOperator weight="10">
  <parameter
idref="branchRates.categories"/>
</uniformIntegerOperator>
</operators>

<!-- Define MCMC
-->
<mcmc id="mcmc" chainLength="4000000"
autoOptimize="true">
  <posterior id="posterior">
    <prior id="prior">
      <booleanLikelihood>
        <monophylyStatistic
idref="monophyly(Fugus)"/>
        <monophylyStatistic
idref="monophyly(28_31)"/>
        <monophylyStatistic
idref="monophyly(38_38XY)"/>
        <monophylyStatistic
idref="monophyly(Clupeocephala)"/>

```

```

upper="165.2">
    </booleanLikelihood>
    <uniformPrior lower="149.85"
    <statistic
idref="tmrca(Clupeocephala)"/>
    </uniformPrior>
    <uniformPrior lower="32.5"
    <statistic
idref="tmrca(Fugus)"/>
    </uniformPrior>
    <uniformPrior lower="96.9"
    <statistic
idref="tmrca(Medaka_Fugus)"/>
    </uniformPrior>
    <oneOnXPrior>
    <parameter
idref="ATPase.1st.kappa"/>
    </oneOnXPrior>
    <oneOnXPrior>
    <parameter
idref="ATPase.2nd.ac"/>
    </oneOnXPrior>
    <oneOnXPrior>
    <parameter
idref="ATPase.2nd.ag"/>
    </oneOnXPrior>
    <oneOnXPrior>
    <parameter
idref="ATPase.2nd.at"/>
    </oneOnXPrior>
    <oneOnXPrior>
    <parameter
idref="ATPase.2nd.cg"/>
    </oneOnXPrior>
    <oneOnXPrior>
    <parameter
idref="ATPase.2nd.gt"/>
    </oneOnXPrior>
    <oneOnXPrior>
    <parameter
idref="ATPase.3rd.kappa"/>
    </oneOnXPrior>
    <oneOnXPrior>
    <parameter
idref="Cytb.1st.kappa"/>
    </oneOnXPrior>
    <oneOnXPrior>
    <parameter
idref="Cytb.2nd.ac"/>
    </oneOnXPrior>
    <oneOnXPrior>
    <parameter
idref="Cytb.2nd.ag"/>
    </oneOnXPrior>

```

Supplementary File S5.xml

```
<oneOnXPrior>
  <parameter
idref="cytb.2nd.at"/>
</oneOnXPrior>
<oneOnXPrior>
  <parameter
idref="cytb.2nd.cg"/>
</oneOnXPrior>
<oneOnXPrior>
  <parameter
idref="cytb.2nd.gt"/>
</oneOnXPrior>
<oneOnXPrior>
  <parameter
idref="cytb.3rd.kappa"/>
</oneOnXPrior>
<oneOnXPrior>
  <parameter
idref="ND2.1st.ac"/>
</oneOnXPrior>
<oneOnXPrior>
  <parameter
idref="ND2.1st.ag"/>
</oneOnXPrior>
<oneOnXPrior>
  <parameter
idref="ND2.1st.at"/>
</oneOnXPrior>
<oneOnXPrior>
  <parameter
idref="ND2.1st.cg"/>
</oneOnXPrior>
<oneOnXPrior>
  <parameter
idref="ND2.1st.gt"/>
</oneOnXPrior>
<oneOnXPrior>
  <parameter
idref="ND2.2nd.ac"/>
</oneOnXPrior>
<oneOnXPrior>
  <parameter
idref="ND2.2nd.ag"/>
</oneOnXPrior>
<oneOnXPrior>
  <parameter
idref="ND2.2nd.at"/>
</oneOnXPrior>
<oneOnXPrior>
  <parameter
idref="ND2.2nd.cg"/>
</oneOnXPrior>
<oneOnXPrior>
  <parameter
idref="ND2.2nd.gt"/>
</oneOnXPrior>
```

Supplementary File S5.xml

```

        <oneOnXPrior>
            <parameter
idref="ND2.3rd.kappa"/>
        </oneOnXPrior>
        <oneOnXPrior>
            <parameter
idref="constant.popSize"/>
        </oneOnXPrior>
        <coalescentLikelihood
idref="coalescent"/>
    </prior>
    <likelihood id="likelihood">
        <treeLikelihood
idref="ATPase.1st.ATPase.1st.treeLikelihood"/>
        <treeLikelihood
idref="ATPase.2nd.ATPase.2nd.treeLikelihood"/>
        <treeLikelihood
idref="ATPase.3rd.ATPase.3rd.treeLikelihood"/>
        <treeLikelihood
idref="Cytb.1st.Cytb.1st.treeLikelihood"/>
        <treeLikelihood
idref="Cytb.2nd.Cytb.2nd.treeLikelihood"/>
        <treeLikelihood
idref="Cytb.3rd.Cytb.3rd.treeLikelihood"/>
        <treeLikelihood
idref="ND2.1st.ND2.1st.treeLikelihood"/>
        <treeLikelihood
idref="ND2.2nd.ND2.2nd.treeLikelihood"/>
        <treeLikelihood
idref="ND2.3rd.ND2.3rd.treeLikelihood"/>
    </likelihood>
    </posterior>
    <operators idref="operators"/>
    <!-- write log to screen
-->
    <log id="screenLog" logEvery="1000">
        <column label="Posterior" dp="4"
width="12">
            <posterior idref="posterior"/>
        </column>
        <column label="Prior" dp="4" width="12">
            <prior idref="prior"/>
        </column>
        <column label="Likelihood" dp="4"
width="12">
            <likelihood idref="likelihood"/>
        </column>
        <column label="rootHeight" sf="6"
width="12">
            <parameter
idref="treeModel.rootHeight"/>
        </column>
        <column label="ucld.mean" sf="6"
width="12">
            <parameter idref="ucld.mean"/>

```

Supplementary File S5.xml

```

        </column>
    </log>
    <!-- write log to file
        -->
    <log id="fileLog" logEvery="1000"
fileName="Codon.NoEigen.4x.log">
        <posterior idref="posterior"/>
        <prior idref="prior"/>
        <likelihood idref="likelihood"/>
        <parameter idref="treeModel.rootHeight"/>
        <tmrcaStatistic idref="tmrca(28_31)"/>
        <tmrcaStatistic idref="tmrca(38_38XY)"/>
        <tmrcaStatistic
idref="tmrca(Clupeocephala)"/>
        <tmrcaStatistic idref="tmrca(Fugus)"/>
        <tmrcaStatistic
idref="tmrca(Medaka_Fugus)"/>
        <tmrcaStatistic
idref="tmrca(Eigenmannias)"/>
        <parameter idref="constant.popSize"/>
        <parameter idref="ATPase.1st.kappa"/>
        <parameter
idref="ATPase.1st.frequencies"/>
        <parameter idref="ATPase.1st.alpha"/>
        <parameter idref="ATPase.2nd.ac"/>
        <parameter idref="ATPase.2nd.ag"/>
        <parameter idref="ATPase.2nd.at"/>
        <parameter idref="ATPase.2nd.cg"/>
        <parameter idref="ATPase.2nd.gt"/>
        <parameter
idref="ATPase.2nd.frequencies"/>
        <parameter idref="ATPase.2nd.alpha"/>
        <parameter idref="ATPase.3rd.kappa"/>
        <parameter
idref="ATPase.3rd.frequencies"/>
        <parameter idref="ATPase.3rd.alpha"/>
        <parameter idref="ATPase.3rd.pInv"/>
        <parameter idref="Cytb.1st.kappa"/>
        <parameter idref="Cytb.1st.frequencies"/>
        <parameter idref="Cytb.1st.pInv"/>
        <parameter idref="Cytb.2nd.ac"/>
        <parameter idref="Cytb.2nd.ag"/>
        <parameter idref="Cytb.2nd.at"/>
        <parameter idref="Cytb.2nd.cg"/>
        <parameter idref="Cytb.2nd.gt"/>
        <parameter idref="Cytb.2nd.frequencies"/>
        <parameter idref="Cytb.2nd.alpha"/>
        <parameter idref="Cytb.2nd.pInv"/>
        <parameter idref="Cytb.3rd.kappa"/>
        <parameter idref="Cytb.3rd.frequencies"/>
        <parameter idref="Cytb.3rd.alpha"/>
        <parameter idref="ND2.1st.ac"/>
        <parameter idref="ND2.1st.ag"/>
        <parameter idref="ND2.1st.at"/>
        <parameter idref="ND2.1st.cg"/>
        <parameter idref="ND2.1st.gt"/>
    </log>

```

Supplementary File S5.xml

```

    <parameter idref="ND2.1st.frequencies"/>
    <parameter idref="ND2.1st.alpha"/>
    <parameter idref="ND2.2nd.ac"/>
    <parameter idref="ND2.2nd.ag"/>
    <parameter idref="ND2.2nd.at"/>
    <parameter idref="ND2.2nd.cg"/>
    <parameter idref="ND2.2nd.gt"/>
    <parameter idref="ND2.2nd.frequencies"/>
    <parameter idref="ND2.2nd.pInv"/>
    <parameter idref="ND2.3rd.kappa"/>
    <parameter idref="ND2.3rd.frequencies"/>
    <parameter idref="ND2.3rd.alpha"/>
    <parameter idref="ND2.3rd.pInv"/>
    <parameter idref="ucl.d.mean"/>
    <parameter idref="ucl.d.stdev"/>
    <rateStatistic idref="meanRate"/>
    <rateStatistic
idref="coefficientOfVariation"/>
    <rateCovarianceStatistic
idref="covariance"/>
    <treeLikelihood
idref="ATPase.1st.ATPase.1st.treeLikelihood"/>
    <treeLikelihood
idref="ATPase.2nd.ATPase.2nd.treeLikelihood"/>
    <treeLikelihood
idref="ATPase.3rd.ATPase.3rd.treeLikelihood"/>
    <treeLikelihood
idref="Cytb.1st.Cytb.1st.treeLikelihood"/>
    <treeLikelihood
idref="Cytb.2nd.Cytb.2nd.treeLikelihood"/>
    <treeLikelihood
idref="Cytb.3rd.Cytb.3rd.treeLikelihood"/>
    <treeLikelihood
idref="ND2.1st.ND2.1st.treeLikelihood"/>
    <treeLikelihood
idref="ND2.2nd.ND2.2nd.treeLikelihood"/>
    <treeLikelihood
idref="ND2.3rd.ND2.3rd.treeLikelihood"/>
    <coalescentLikelihood idref="coalescent"/>

</log>
<!-- write tree log to file
-->
<logTree id="treeFileLog" logEvery="1000"
nexusFormat="true" fileName="Codon.NoEigen.trees"
sortTranslationTable="true">
    <treeModel idref="treeModel"/>
    <discretizedBranchRates
idref="branchRates"/>
    <posterior idref="posterior"/>
</logTree>
</mcmc>

<report>
    <property name="timer">
        <mcmc idref="mcmc"/>

```

```
Supplementary File S5.xml
  </property>
</report>
</beast>
```
